# Supplementary material for: The impact of virtual care on antibiotic prescribing practices for Urinary Tract Infections (UTIs): a propensity-score matched cohort study
Source: Research Square preprint supplement (doi:10.21203/rs.3.rs-8041551/v1), 2025-12-08

# The impact of virtual care on antibiotic prescribing practices for Urinary Tract Infections (UTIs): propensity-score matched cohort study [Supplemental Material]

**Table S1** - UTI diagnostic codes from the MSP dataset

| ICD-9 Codes | Definition |
| --- | --- |
| 595.0 | Acute cystitis |
| 599.0 | Urinary tract infection, site not specified |
| 788 | Symptoms involving urinary system |
| 788.1 | Dysuria |
| 788.4 | Frequency of urination and polyuria |
| 788.6 | Other abnormality of urination |

**Table S2** - Fee-item codes corresponding a virtual care visit from the MSP dataset

| Virtual Visit Type | Fee-Item Codes |
| --- | --- |
| | Consultation |  | | --- | --- | | 13036, 13236, 13436, 13536, 13636, 13736, 13836, 13016 |
| | Visit |  | | --- | --- | | 13037, 13237, 13437, 13537, 13637, 13737, 13837, 13017 |
| | Counseling |  | | --- | --- | | 13038, 13238, 13438, 13538, 13638, 13738, 13838, 13018 |
| | Telephone management fee |  | | --- | --- | | 14076, 14078, 13706, 13707 |
| | Telephone follow-up | | --- | | 14023 |

**Table S3** - Fee-item codes corresponding to an in-person visit from the MSP dataset

| In-Person Visit Type | Fee-Item Codes |
| --- | --- |
| | In-office visit |  | | --- | --- | | 12100, 00100, 15300, 16100, 17100, 18100 |
| | In-office consultation |  | | --- | --- | | 12110, 00110, 15310, 16110, 17110, 18110 |
| | In-office complete visit |  | | --- | --- | | 12101, 00100, 15301, 16101, 17101, 18101 |
| | In-office counseling |  | | --- | --- | | 12120, 00120, 15320, 16120, 17120, 18120 |
| | Out-of-office visit | | --- | | 12200, 13200, 15200, 16200, 17200, 18200 |
| | Out-of-office consultation |  | | --- | --- | | 12210, 13210, 15210, 16210, 17210, 18210 |
| | Out-of-office complete examination |  | | --- | --- | | 12201, 13201, 15201, 16201, 17201, 18201 |
| | Out-of-office counseling |  | | --- | --- | | 12220, 13220, 15220, 16220, 17220, 18220 |

**Figure S2 -** Probability density plot of estimated propensity scores by treatment group in the propensity score matched cohort of all individuals treated for a UTI in BC in 2022

**Figure S1 -** Probability density plot of estimated propensity scores by treatment group in the full unmatched cohort of all individuals treated for a UTI in BC in 2022


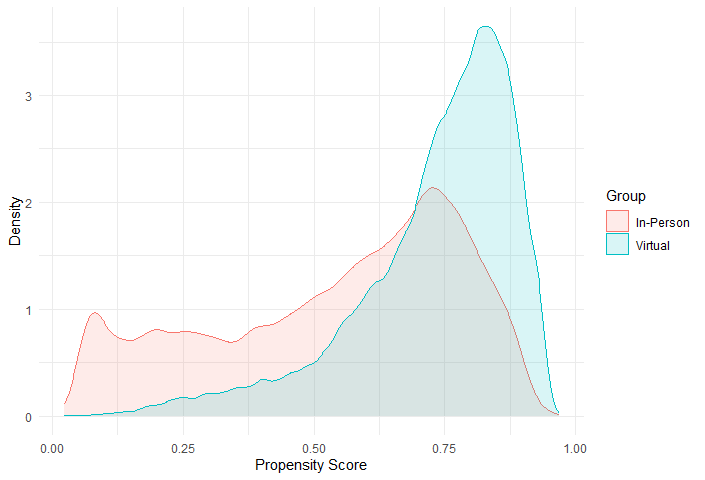


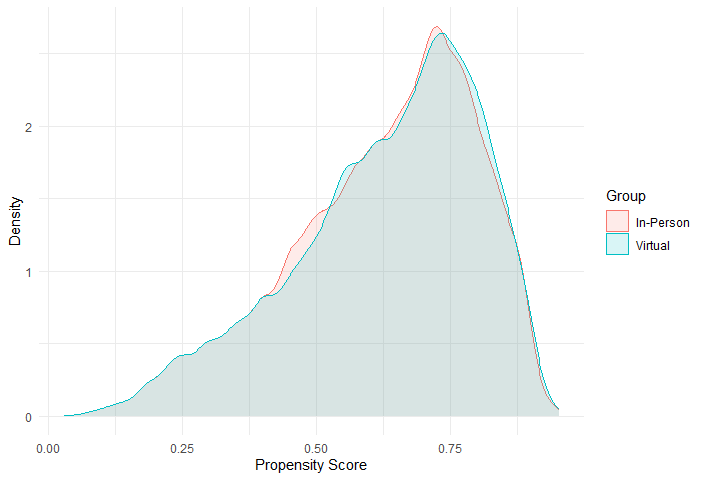


**Figure S3 -** Probability density plot of estimated inverse propensity scores by treatment group in the IPTW-weighted cohort of all individuals treated for a UTI in British Columbia in 2022


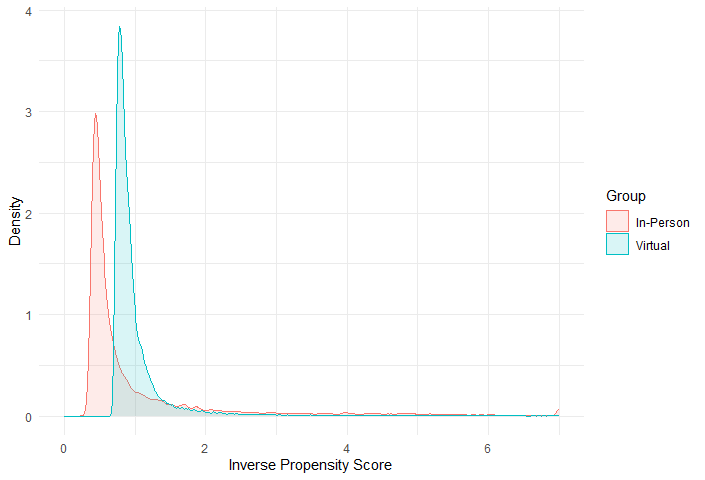


**Figure S4 -** Probability density plot of estimated propensity scores by treatment group in the full unmatched cohort of all individuals dispensed an antibiotic UTI in BC in 2022

**Figure S5 -** Probability density plot of estimated propensity scores by treatment group in the propensity score matched cohort of all individuals dispensed an antibiotic UTI in BC in 2022


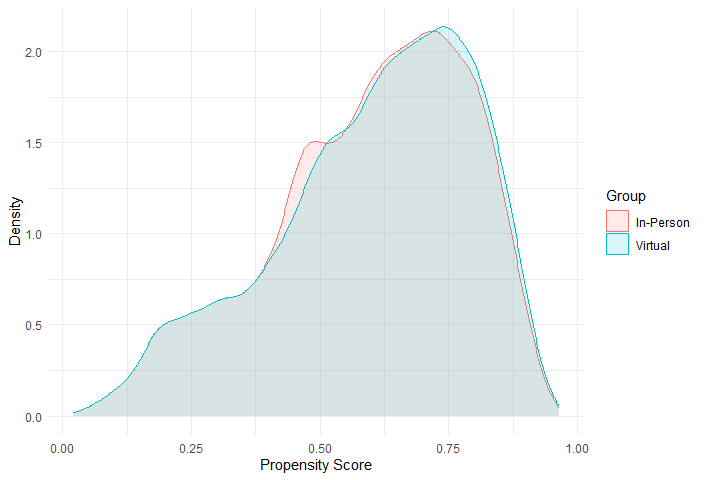


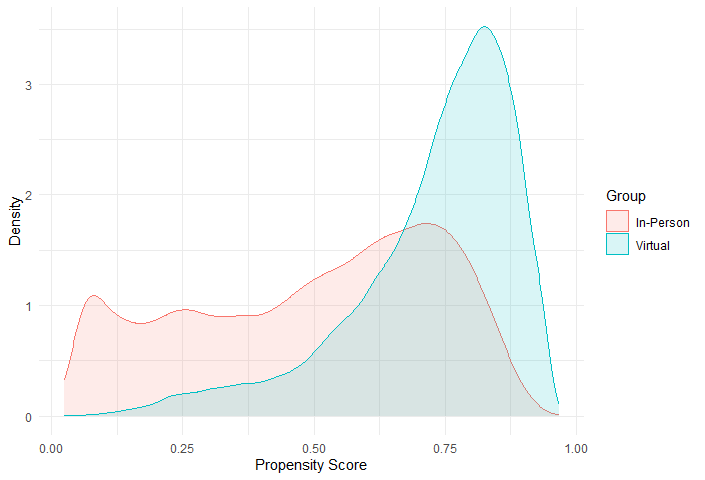


**Figure S6 -** Probability density plot of estimated inverse propensity scores by treatment group in the IPTW-weighted cohort of all individuals dispensed an antibiotic UTI in BC in 2022


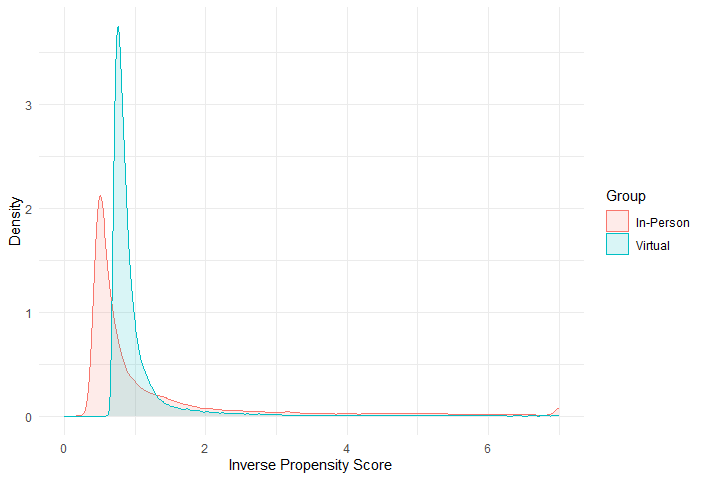


**Figure S7 -** Probability density plot of estimated propensity scores by treatment group in the full unmatched cohort of all individuals dispensed nitrofurantoin UTI in BC in 2022

**Figure S8 -** Probability density plot of estimated propensity scores by treatment group in the propensity score matched cohort of all individuals dispensed nitrofurantoin UTI in BC in 2022


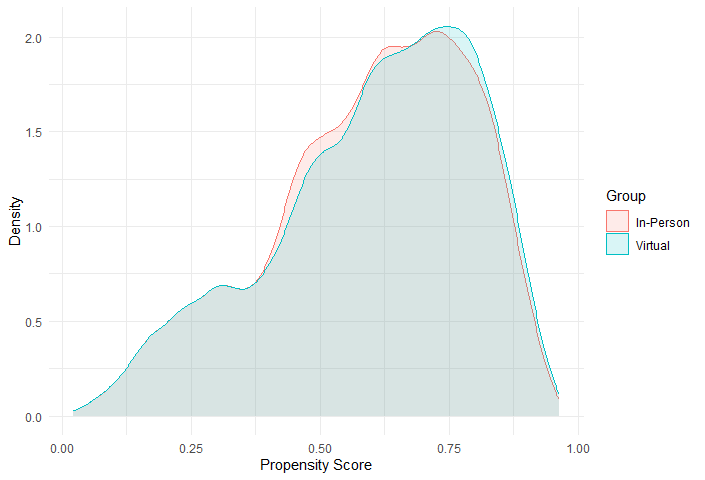


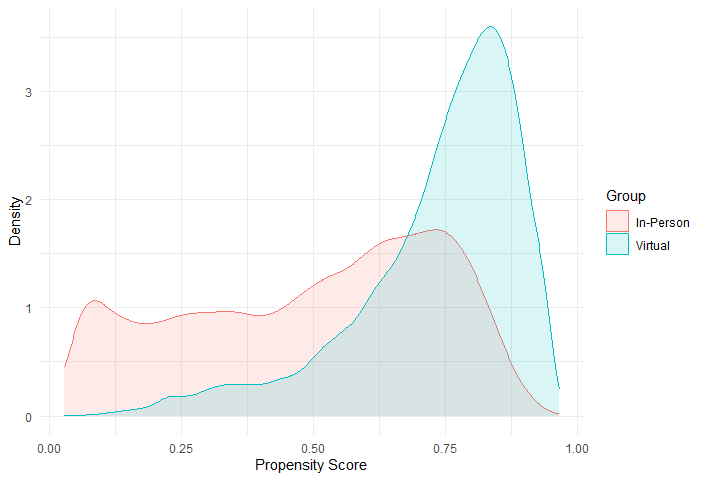


**Figure S9 -** Probability density plot of estimated inverse propensity scores by treatment group in the IPTW-weighted cohort of all individuals dispensed nitrofurantoin UTI in BC in 2022


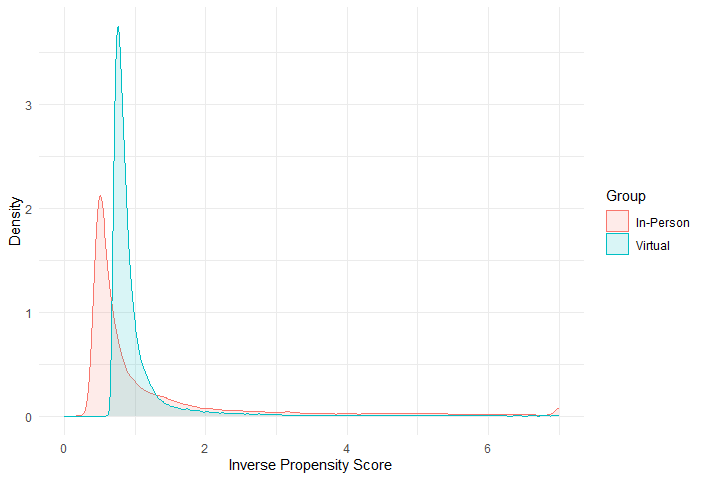

Supplement: Supplementary file 1 [file 08d5e01126652ae519305575.docx]
